# Supplementary material for: Constructing spin crossover-fluorescence bifunctional iron(ii) complexes based on tetraphenyl ethylene-decorated AIEgens
Source: Royal Society of Chemistry journal article supplement (doi:10.1039/d2dt04130h), 2023-01-01
Supplement: d2dt04130h1.pdf [file d2dt04130h1.pdf]

## Supplementary Materials

### Constructing Spin Crossover-Fluorescence Bifunctional Iron(II) complexes based on Tetraphenyl Ethylene-Decorated AIEgen

Cheng Yi <sup>a</sup>, Shi-Hui Zhang,<sup>a</sup> Liang Zhao <sup>a</sup>, Nian-Tao Yao <sup>a</sup>, Guo-Hui Zhao, Yin-Shan Meng <sup>a</sup>, Tao Liu <sup>a\*</sup>

<sup>a</sup>*State Key Laboratory of Fine Chemicals, Dalian University of Technology, Dalian, 116024, P. R. China*

E-mail: [liutao@dlut.edu.cn](mailto:liutao@dlut.edu.cn) (T. Liu)

## CONTENTS

|                                                                                                                                                                                                                                                                                          |    |
|------------------------------------------------------------------------------------------------------------------------------------------------------------------------------------------------------------------------------------------------------------------------------------------|----|
| Experimental section.....                                                                                                                                                                                                                                                                | 4  |
| <b>Table S1.</b> Crystallographic data for <b>1</b> , <b>2</b> , and <b>3</b> at different temperatures.....                                                                                                                                                                             | 5  |
| <b>Table S2.</b> Selected Bond lengths (Å) for <b>1</b> , <b>2</b> and <b>3</b> at different temperatures.....                                                                                                                                                                           | 6  |
| <b>Table S3.</b> Selected Bond Angles (°) for <b>1</b> at 120 K.....                                                                                                                                                                                                                     | 7  |
| <b>Table S4.</b> Selected Bond Angles (°) for <b>2</b> and <b>3</b> at different temperatures.....                                                                                                                                                                                       | 8  |
| <b>Fig. S2.</b> TGA curve for complex <b>1</b> in N <sub>2</sub> atmosphere with a heating rate of 10 °C·min <sup>-1</sup> .....                                                                                                                                                         | 9  |
| <b>Fig. S3.</b> TGA curve for complex <b>2</b> in N <sub>2</sub> atmosphere with a heating rate of 10 °C·min <sup>-1</sup> .....                                                                                                                                                         | 10 |
| <b>Fig. S4.</b> TGA curve for complex <b>3</b> in N <sub>2</sub> atmosphere with a heating rate of 10 °C·min <sup>-1</sup> .....                                                                                                                                                         | 11 |
| <b>Fig. S5.</b> The PXRD pattern of complex <b>1</b> and the simulated one based on the single-crystal structure.....                                                                                                                                                                    | 12 |
| <b>Fig. S6.</b> The PXRD pattern of complex <b>2</b> and the simulated one based on the single-crystal structure.....                                                                                                                                                                    | 13 |
| <b>Fig. S7.</b> The PXRD pattern of complex <b>3</b> and the simulated one based on the single-crystal structure.....                                                                                                                                                                    | 14 |
| <b>Fig. S8.</b> The Crystal structure of <b>1</b> at 120 K.....                                                                                                                                                                                                                          | 15 |
| <b>Fig. S9.</b> The Crystal structure of <b>2</b> at 120 (top) and 275 (bottom) K.....                                                                                                                                                                                                   | 16 |
| <b>Fig. S10.</b> The Crystal structure of <b>3</b> at 120 (top) and 275 (bottom) K.....                                                                                                                                                                                                  | 17 |
| <b>Fig. S11</b> Fluorescence excitation spectra for the ligand tpe-bpp in pure DMF solution.....                                                                                                                                                                                         | 18 |
| <b>Fig. S12.</b> PL intensity at maximum PL intensity as a function of water fraction for tpe-bpp at room temperature. Inset showed the photographs of tpe-bpp in DMF/water mixtures with different water fractions under 365 nm UV illumination.....                                    | 19 |
| <b>Fig. S13.</b> PL intensity at maximum PL intensity as a function of water fraction for <b>1</b> at room temperature. Inset showed the photographs of <b>1</b> in DMF/water mixtures with different water fractions under 365 nm UV illumination.....                                  | 20 |
| <b>Fig. S14.</b> PL intensity at maximum PL intensity as a function of water fraction for <b>3</b> at room temperature. Inset showed the photographs of <b>3</b> in DMF/water mixtures with different water fractions under 365 nm UV illumination.....                                  | 21 |
| <b>Fig. S15.</b> d( $\chi_M T$ )/dT versus $T$ for complex <b>1</b> .....                                                                                                                                                                                                                | 22 |
| <b>Fig. S16.</b> d( $\chi_M T$ )/dT versus $T$ for complex <b>2</b> .....                                                                                                                                                                                                                | 23 |
| <b>Fig. S17.</b> d( $\chi_M T$ )/dT versus $T$ for complex <b>3</b> .....                                                                                                                                                                                                                | 24 |
| <b>Fig. S18.</b> (a) Luminescence emission spectrum for the tpe-bpp ligand in the solid state at 100 K. (b) The PL intensity of maximum emission as a function of temperature for solid tpe-bpp.....                                                                                     | 25 |
| <b>Fig. S19.</b> Luminescence emission spectrum for the complex <b>1</b> in solid state at 100 K. (b) Plots of the HS fraction of Fe <sup>II</sup> ion (□ black squares) and the PL intensity of maximum emission (□ pink squares) as a function of temperature for solid <b>1</b> ..... | 26 |
| <b>Fig. S20.</b> Luminescence emission spectrum for the complex <b>2</b> in solid state at 100 K. (b) Plots of the HS fraction of Fe <sup>II</sup> ion (□ black squares) and the PL intensity of maximum emission (□ pink squares) as a function of temperature for solid <b>2</b> ..... | 27 |

|                                                                                                                                                                                                                                                                                            |    |
|--------------------------------------------------------------------------------------------------------------------------------------------------------------------------------------------------------------------------------------------------------------------------------------------|----|
| <b>Fig. S21.</b> Luminescence emission spectrum for the complex <b>3</b> in solid state at 100 K. (b) Plots of the HS fraction of Fe <sup>II</sup> ion (□ black squares) and the PL intensity of maximum emission (□ pink squares) as a function of temperature for solid <b>3</b> . ..... | 28 |
| <b>Fig. S22.</b> The intermolecular short contact interactions between tpe units and other groups for <b>1</b> at 120 K (yellow dashed lines). .....                                                                                                                                       | 29 |
| <b>Fig. S23.</b> The intermolecular short contact interactions (yellow dashed lines) between tpe units and other groups for <b>2</b> at 120K (top) and 275 K (bottom). .....                                                                                                               | 30 |
| <b>Fig. S24.</b> The intermolecular short contact interactions (yellow dashed lines) between tpe units and other groups for <b>3</b> at 120 (top) and 300 (bottom) K. .....                                                                                                                | 31 |
| <b>Table S5.</b> Short contact interactions between phenyl and other groups for <b>1</b> at 120 K. ....                                                                                                                                                                                    | 32 |
| <b>Table S6.</b> Short contact interactions between phenyl and other groups for <b>2</b> at 120 and 275 K. ....                                                                                                                                                                            | 33 |
| <b>Table S7.</b> Short contact interactions between phenyl and other groups for <b>3</b> at 120 and 275 K. ....                                                                                                                                                                            | 34 |
| <b>Fig. S25.</b> Crystal packing diagram of complex <b>1</b> . .....                                                                                                                                                                                                                       | 35 |
| <b>Fig. S26.</b> Crystal packing diagram of complex <b>2</b> . .....                                                                                                                                                                                                                       | 36 |
| <b>Fig. S27.</b> Crystal packing diagram of complex <b>3</b> . .....                                                                                                                                                                                                                       | 37 |

## Experimental section.

### Materials

Tpe-CHO, bpp-COOH, bpp-COOEt, bpp-CH<sub>2</sub>OH, bpp-CH<sub>2</sub>Br, and bpp-CH<sub>2</sub>P(O)(OEt)<sub>2</sub> were prepared according to literature methods<sup>1</sup>. All other chemicals are commercially available and were used without further purification.

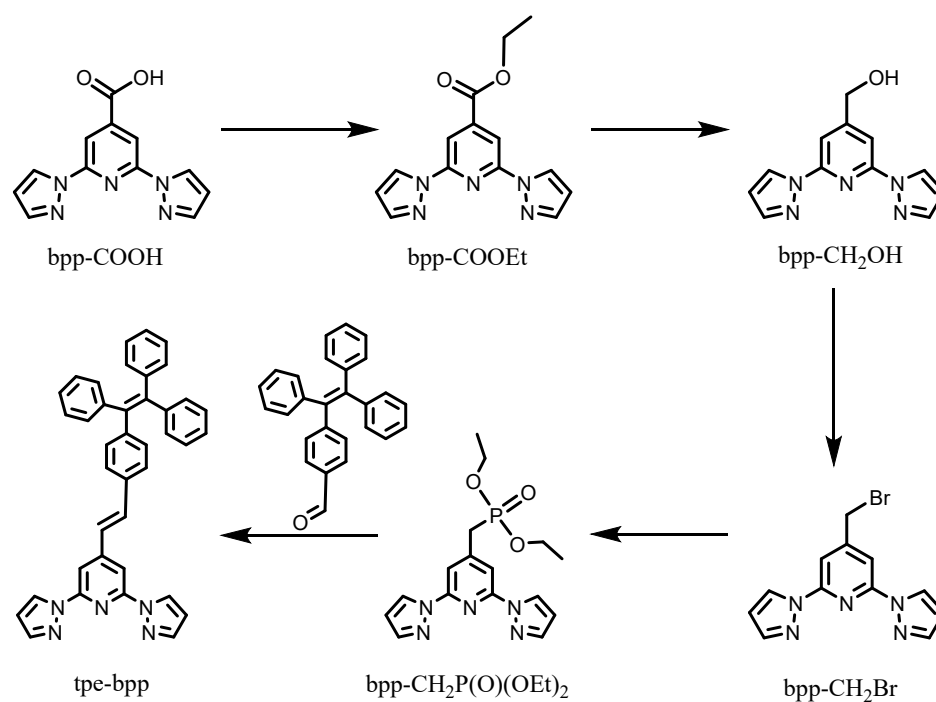

**Scheme S1**

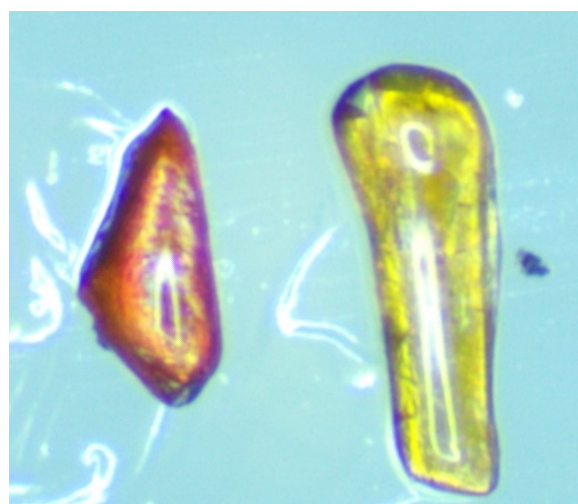

**Fig. S1.** Photographs of single crystals for **1** and **2** in the vacuum grease under the optical microscope at room temperature.

**Table S1.** Crystallographic data for **1**, **2**, and **3** at different temperatures.

| Compounds                               | <b>1</b>      | <b>2</b>      | <b>2</b>      | <b>3</b>      | <b>3</b>      |
|-----------------------------------------|---------------|---------------|---------------|---------------|---------------|
| CCDC                                    | 2226385       | 2225794       | 2225800       | 2225801       | 2225804       |
| T, K                                    | 120           | 120           | 275K          | 120           | 275           |
| $F_w$                                   | 1634.25       | 1551.10       | 1551.10       | 1516.48       | 1517.11       |
| crystal system                          | Triclinic     | Triclinic     | Triclinic     | Triclinic     | Triclinic     |
| Space group                             | $P\bar{1}$    | $P\bar{1}$    | $P\bar{1}$    | $P\bar{1}$    | $P\bar{1}$    |
| $a$ , Å                                 | 14.5133(19)   | 12.9914(6)    | 13.207(3)     | 12.8968(7)    | 13.064(4)     |
| $b$ , Å                                 | 23.240(4)     | 17.0329(8)    | 17.273(3)     | 16.9841(9)    | 17.158(6)     |
| $c$ , Å                                 | 24.914(4)     | 18.9494(8)    | 19.209(3)     | 19.0169(11)   | 19.208(6)     |
| $\alpha$ , °                            | 105.490(6)    | 63.7760(10)   | 63.904(5)     | 63.584(2)     | 63.673(10)    |
| $\beta$ , °                             | 101.434(6)    | 84.270(2)     | 84.196(6)     | 83.769(2)     | 84.103(12)    |
| $\gamma$ , °                            | 101.383(5)    | 86.755(2)     | 86.212(7)     | 86.568(2)     | 86.368(12)    |
| $V$ , Å <sup>3</sup>                    | 7654(2)       | 3742.4(3)     | 3914.0(12)    | 3708.2(4)     | 3838(2)       |
| $Z$                                     | 4             | 2             | 2             | 2             | 2             |
| $D_{\text{calc}}$ (mg/m <sup>3</sup> )  | 1418          | 1376          | 1314          | 1358          | 1313          |
| $F(000)$                                | 3363.0        | 1612.0        | 1610.0        | 1571.0        | 1572.0        |
| Reflections collected                   | 146531        | 40737         | 57443         | 28903         | 34320         |
| Unique reflections ( $R_{\text{int}}$ ) | 34866(0.0373) | 13655(0.0566) | 14309(0.0661) | 13075(0.0582) | 13257(0.0595) |
| Goodness-of-fit on $F^2$                | 1.038         | 1.027         | 1.031         | 1.048         | 1.026         |
| $R_1 [I > 2\sigma(I)]^a$                | 0.0567        | 0.0524        | 0.0620        | 0.0664        | 0.0652        |
| $wR_2 [I > 2\sigma(I)]^b$               | 0.1439        | 0.1288        | 0.1611        | 0.1700        | 0.1729        |

$$R_1 = \sum (|F_o| - |F_c|) / \sum |F_o|; wR_2 = [\sum w (|F_o| - |F_c|)^2 / \sum w F_o^2]^{1/2}$$

**Table S2.** Selected Bond lengths (Å) for **1**, **2** and **3** at different temperatures.

| <b>1</b>             |           |                      |           | <b>2</b>             |           |           | <b>3</b>  |           |
|----------------------|-----------|----------------------|-----------|----------------------|-----------|-----------|-----------|-----------|
| 120 K                |           |                      |           | 120 K                | 275 K     | 120 K     | 275 K     |           |
| No                   | Length(Å) | No                   | Length(Å) | No                   | Length(Å) | Length(Å) | Length(Å) | Length(Å) |
| Fe1–N1               | 1.896(1)  | Fe2–N11              | 1.896(1)  | Fe1–N1               | 1.906(2)  | 2.113(3)  | 1.900(4)  | 2.106(3)  |
| Fe1–N2               | 1.984(2)  | Fe2–N12              | 1.976(2)  | Fe1–N2               | 1.980(3)  | 2.191(4)  | 1.975(5)  | 2.178(4)  |
| Fe1–N3               | 1.976(1)  | Fe2–N13              | 1.976(2)  | Fe1–N3               | 1.972(2)  | 2.171(3)  | 1.978(5)  | 2.168(4)  |
| Fe1–N4               | 1.897(1)  | Fe2–N14              | 1.897(1)  | Fe1–N4               | 1.905(2)  | 2.132(3)  | 1.897(5)  | 2.124(4)  |
| Fe1–N5               | 1.964(1)  | Fe2–N15              | 1.976(2)  | Fe1–N5               | 1.996(2)  | 2.202(4)  | 1.992(5)  | 2.193(5)  |
| Fe1–N6               | 1.977(1)  | Fe2–N16              | 1.983(2)  | Fe1–N6               | 1.987(2)  | 2.192(3)  | 1.984(5)  | 2.185(4)  |
| Fe1–N <sub>avg</sub> | 1.949     | Fe2–N <sub>avg</sub> | 1.951     | Fe1–N <sub>avg</sub> | 1.958     | 2.167     | 1.959     | 2.159     |

**Table S3.** Selected Bond Angles (°) for **1** at 120 K.

| <b>1</b>              |           |                       |           |
|-----------------------|-----------|-----------------------|-----------|
| N2–Fe1–N6             | 92.50(8)  | N13–Fe2–N12           | 160.00(8) |
| N2–Fe1–N5             | 92.22(8)  | N13–Fe2–N15           | 91.28(9)  |
| N4–Fe1–N2             | 99.56(8)  | N14–Fe2–N13           | 100.07(8) |
| N4–Fe1–N1             | 178.32(8) | N14–Fe2–N16           | 79.84(8)  |
| N4–Fe1–N3             | 100.60(8) | N14–Fe2–N12           | 99.90(8)  |
| N4–Fe1–N6             | 79.88(8)  | N14–Fe2–N15           | 80.33(8)  |
| N4–Fe1–N5             | 80.18(8)  | N16–Fe2–N13           | 92.20(8)  |
| N1–Fe1–N2             | 79.88(8)  | N16–Fe2–N12           | 92.34(8)  |
| N1–Fe1–N3             | 80.02(8)  | N16–Fe2–N15           | 160.17(8) |
| N1–Fe1–N6             | 98.54(8)  | N11–Fe2–N13           | 80.19(8)  |
| N1–Fe1–N5             | 101.41(8) | N11–Fe2–N14           | 179.67(8) |
| N3–Fe1–N2             | 159.76(8) | N11–Fe2–N16           | 99.95(8)  |
| N3–Fe1–N6             | 92.79(8)  | N11–Fe2–N12           | 79.84(8)  |
| N3–Fe1–N5             | 89.44(8)  | N11–Fe2–N15           | 99.89(8)  |
| N5–Fe1–N6             | 160.01(7) | N15–Fe2–N12           | 91.02(8)  |
| $\Sigma_{\text{Fe1}}$ | 88.22     | $\Sigma_{\text{Fe2}}$ | 86.45     |
| CShM <sub>Fe1</sub>   | 2.117     | CShM <sub>Fe2</sub>   | 2.064     |

$\Sigma_{\text{Fe}}$ : the sum of  $|90-\alpha|$  for the 12 cis-N-Fe-N angles around the iron atom. CShM<sub>Fe</sub>: the continuous shape measurement relative to ideal octahedron of the Fe center.

**Table S4.** Selected Bond Angles (°) for **2** and **3** at different temperatures.

| Compound              | <b>2</b>   | <b>2</b>   | <b>3</b>   | <b>3</b>   |
|-----------------------|------------|------------|------------|------------|
| Temperature(K)        | 120        | 275        | 120        | 275        |
| N2–Fe1–N6             | 93.50(10)  | 95.20(11)  | 93.53(13)  | 95.25(12)  |
| N2–Fe1–N5             | 90.82(10)  | 94.39(12)  | 90.88(13)  | 94.13(12)  |
| N4–Fe1–N2             | 100.70(9)  | 107.14(10) | 100.41(13) | 107.03(11) |
| N4–Fe1–N1             | 179.21(10) | 177.37(10) | 179.37(14) | 178.44(11) |
| N4–Fe1–N3             | 100.06(10) | 105.42(10) | 100.09(13) | 105.43(11) |
| N4–Fe1–N6             | 79.94(9)   | 73.59(10)  | 79.85(13)  | 73.63(11)  |
| N4–Fe1–N5             | 79.35(9)   | 73.08(10)  | 79.55(14)  | 73.16(11)  |
| N1–Fe1–N2             | 79.54(9)   | 73.47(10)  | 79.64(13)  | 73.66(10)  |
| N1–Fe1–N3             | 79.71(9)   | 74.06(10)  | 79.88(13)  | 73.94(10)  |
| N1–Fe1–N6             | 100.81(9)  | 108.97(10) | 100.78(13) | 107.76(11) |
| N1–Fe1–N5             | 99.90(9)   | 104.36(10) | 99.83(13)  | 105.45(11) |
| N3–Fe1–N2             | 159.22(9)  | 147.41(9)  | 159.49(13) | 147.48(10) |
| N3–Fe1–N6             | 89.42(9)   | 92.69(11)  | 89.15(13)  | 92.00(12)  |
| N3–Fe1–N5             | 93.69(10)  | 96.17(12)  | 93.74(14)  | 96.95(12)  |
| N5–Fe1–N6             | 159.28(9)  | 146.67(10) | 159.38(13) | 146.79(11) |
| $\Sigma_{\text{Fe1}}$ | 91.52      | 150.14     | 91.19      | 149.61     |
| CShM <sub>Fe1</sub>   | 2.249      | 5.500      | 2.215      | 5.464      |

$\Sigma_{\text{Fe}}$ : the sum of  $|90 - \alpha|$  for the 12 cis-N-Fe-N angles around the iron atom. CShM<sub>Fe</sub>: the continuous shape measurement relative to the ideal octahedron of the Fe center.



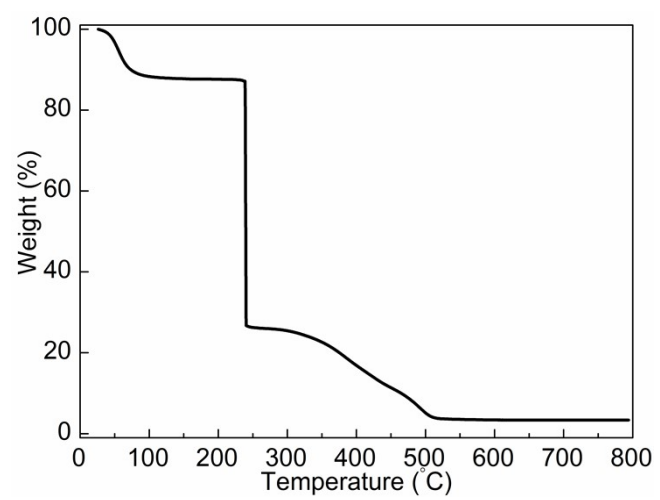

**Fig. S2** TGA curve for complex **1** in N<sub>2</sub> atmosphere with a heating rate of 10 °C·min<sup>-1</sup>.

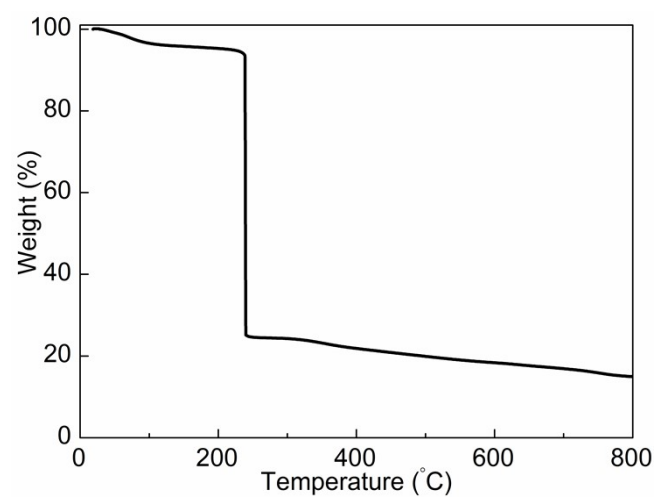

**Fig. S3** TGA curve for complex **2** in N<sub>2</sub> atmosphere with a heating rate of 10 °C·min<sup>-1</sup>.

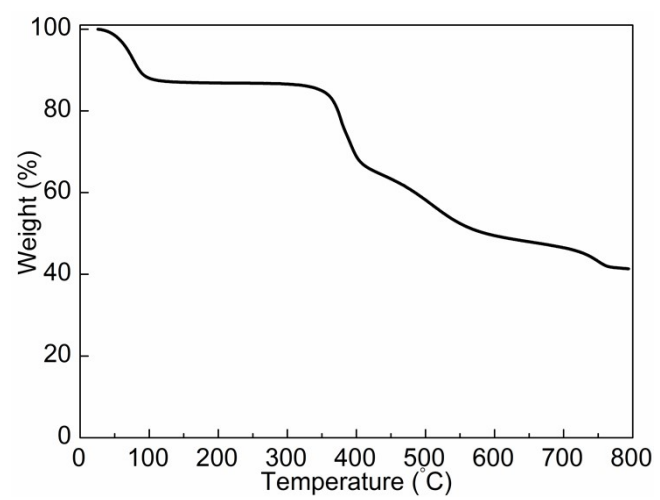

**Fig. S4** TGA curve for complex **3** in N<sub>2</sub> atmosphere with a heating rate of 10 °C·min<sup>-1</sup>.

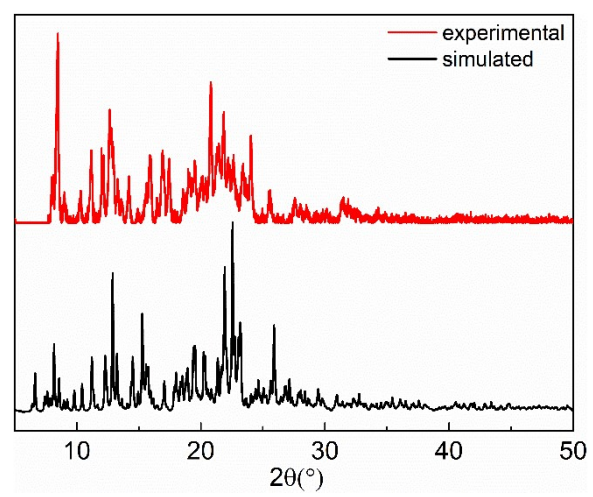

**Fig. S5** The PXRd pattern of complex **1** and the simulated one based on the single-crystal structure.

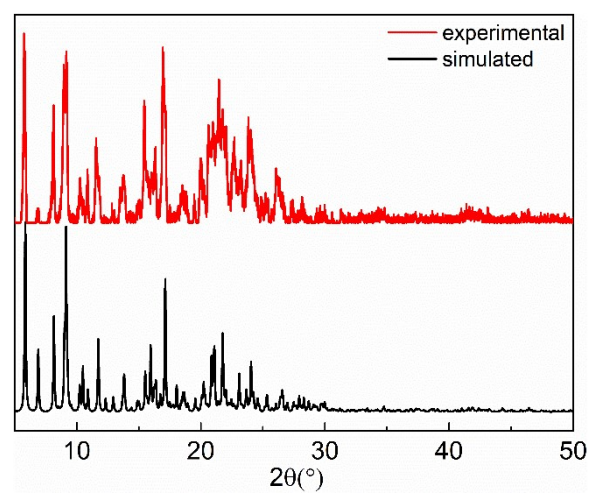

**Fig. S6** The PXRd pattern of complex **2** and the simulated one based on the single-crystal structure.

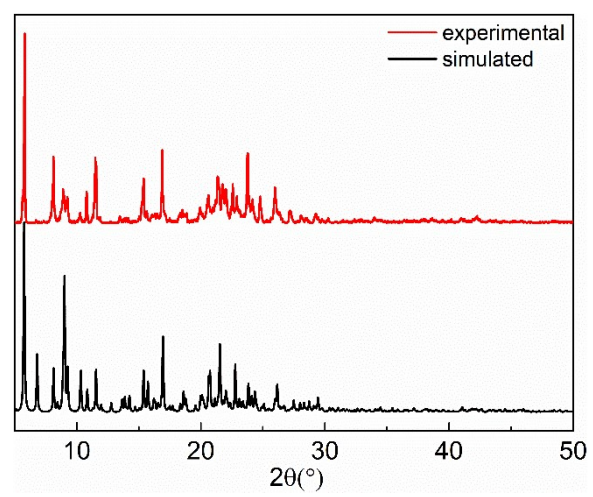

**Fig. S7** The PXRD pattern of complex **3** and the simulated one based on the single-crystal structure.

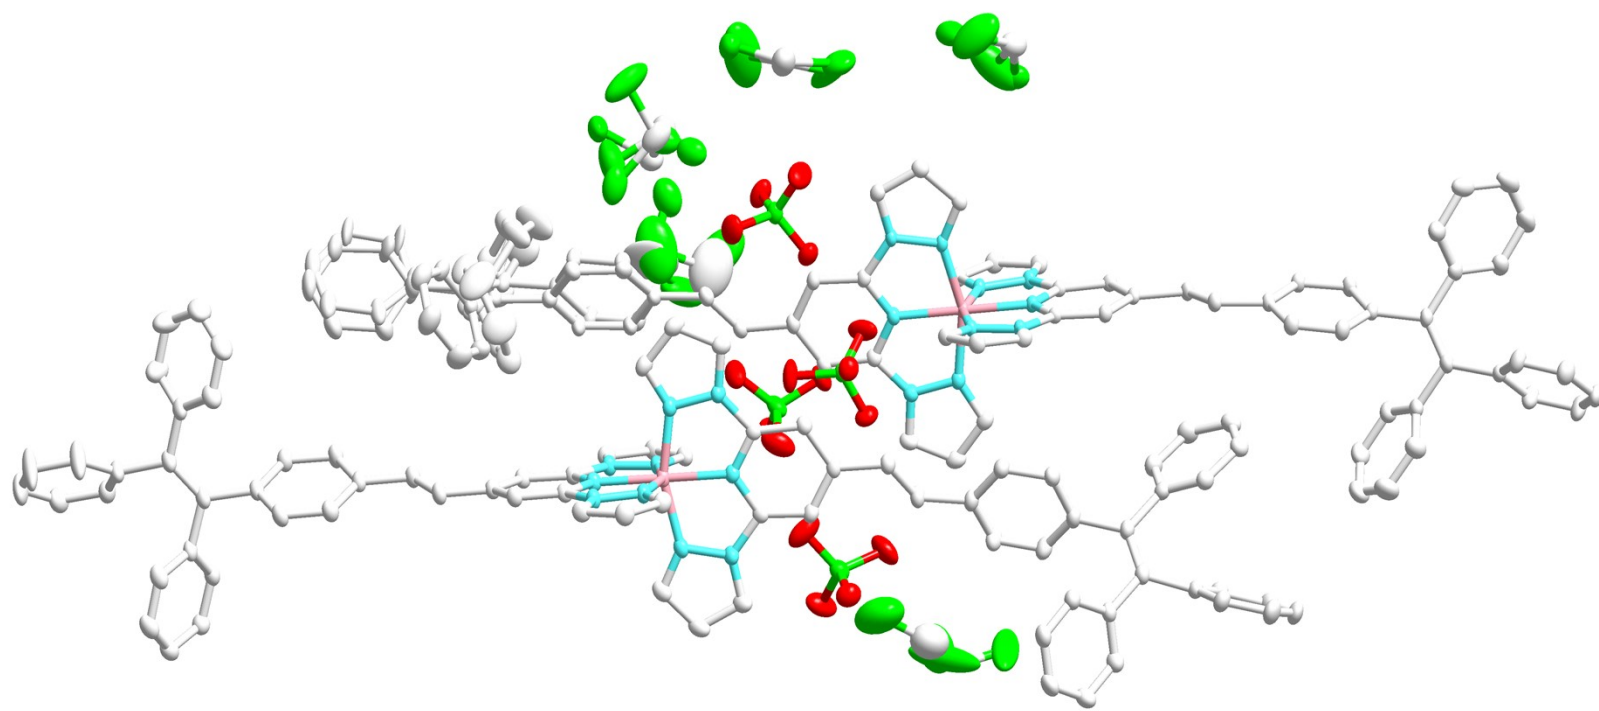

**Fig. S8** The Crystal structure of **1** at 120 K.

Top

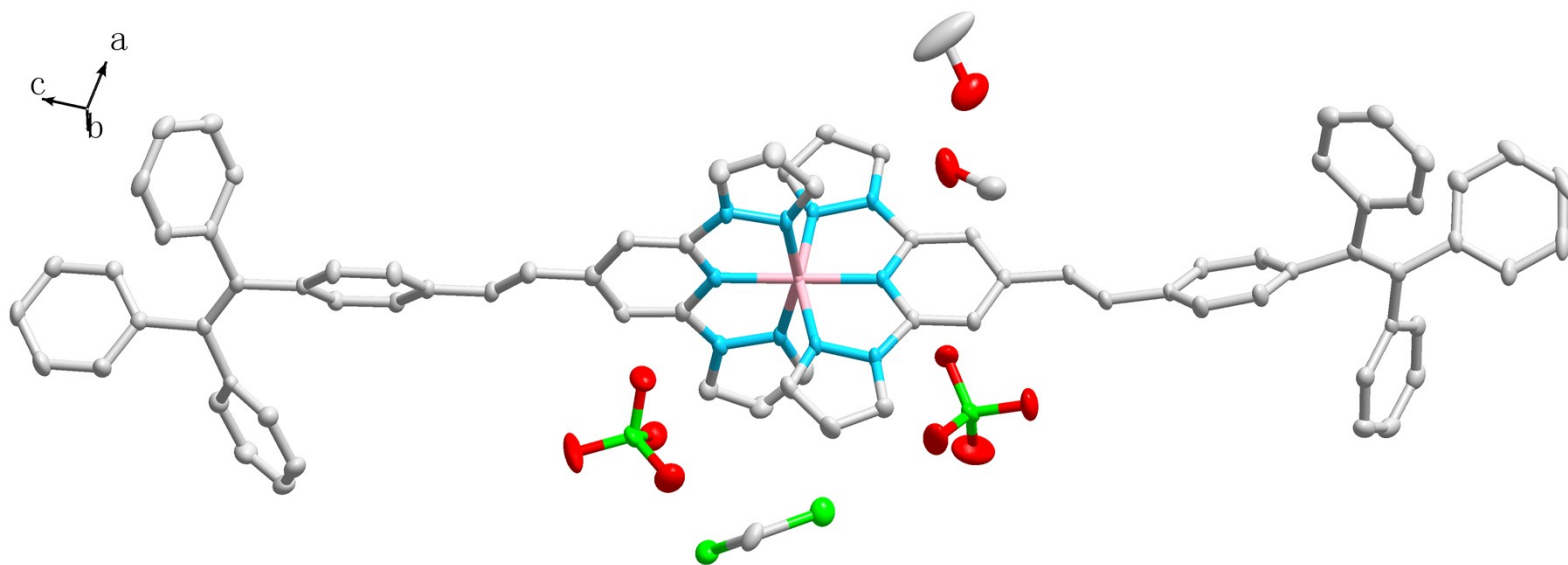

Bottom

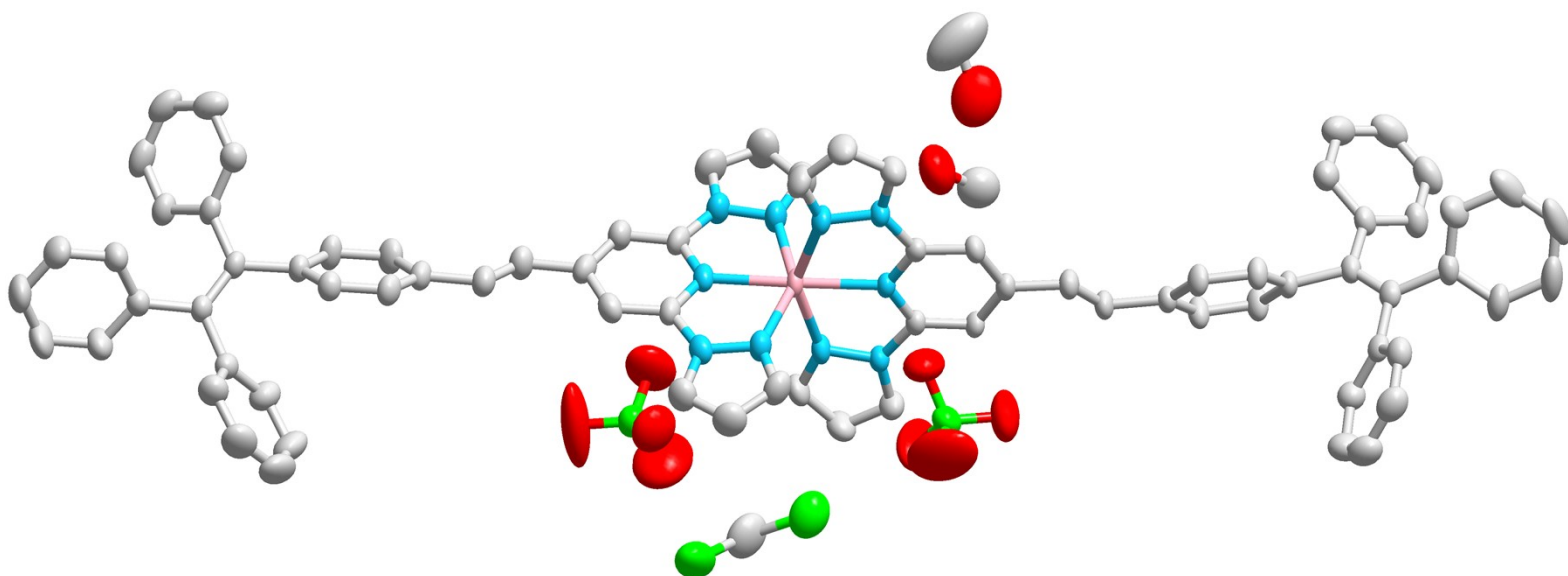

**Fig. S9** The Crystal structure of **2** at 120 (top) and 275 (bottom) K.



Top

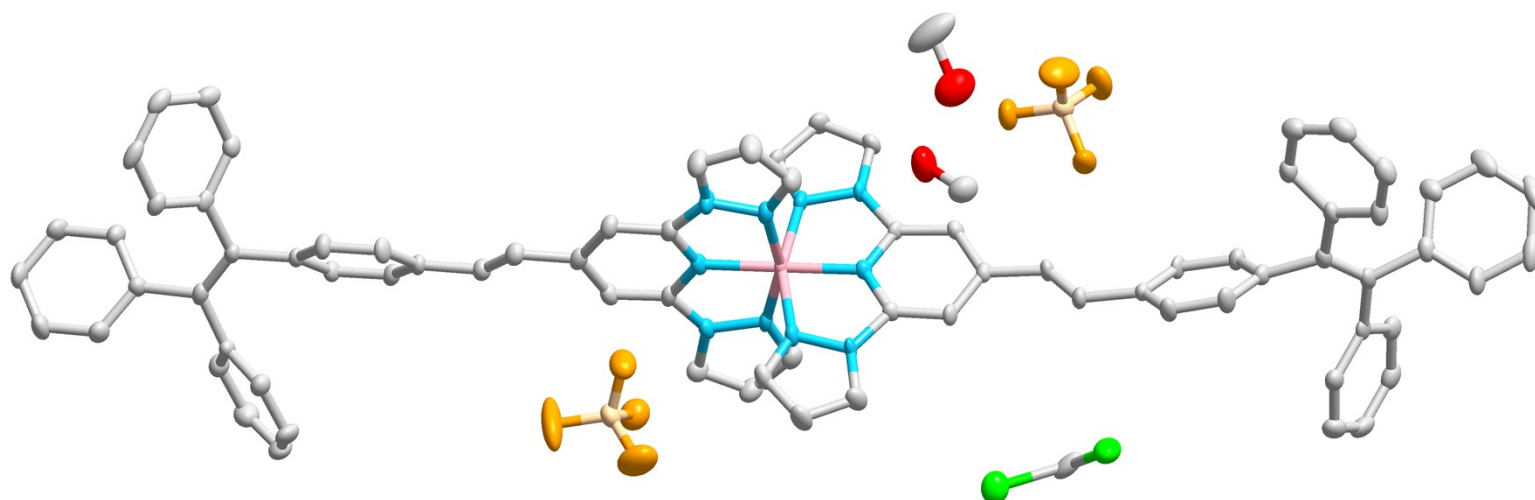

Bottom

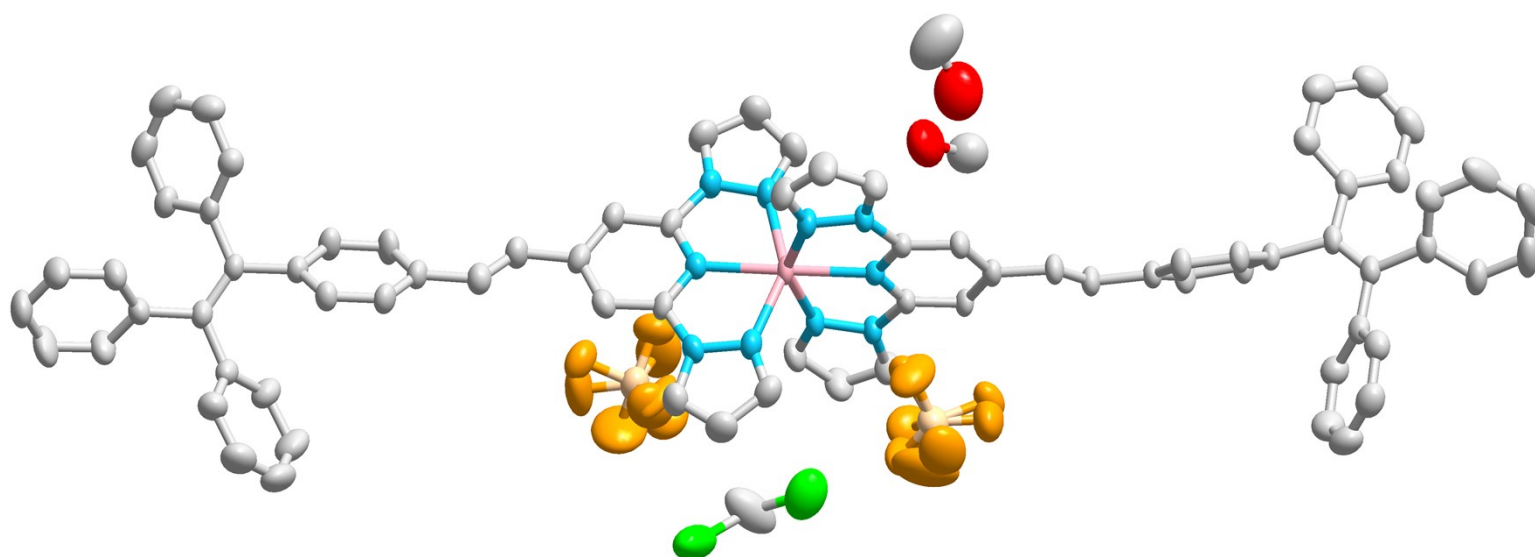

**Fig. S10** The Crystal structure of **3** at 120 (top) and 275 (bottom) K.

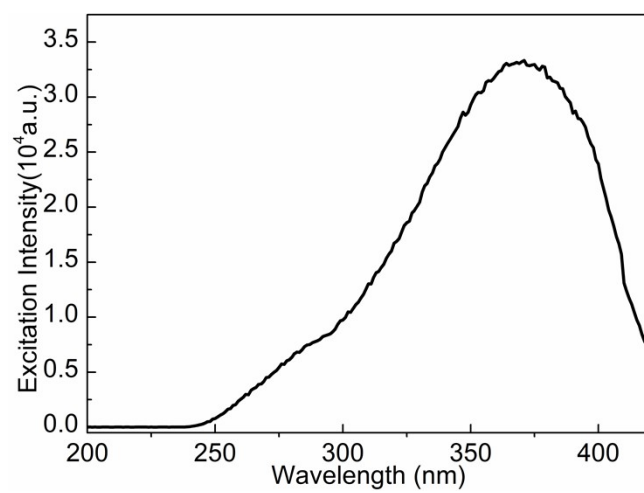

**Fig. S11** Fluorescence excitation spectra for the ligand tpe-bpp in pure DMF solution.

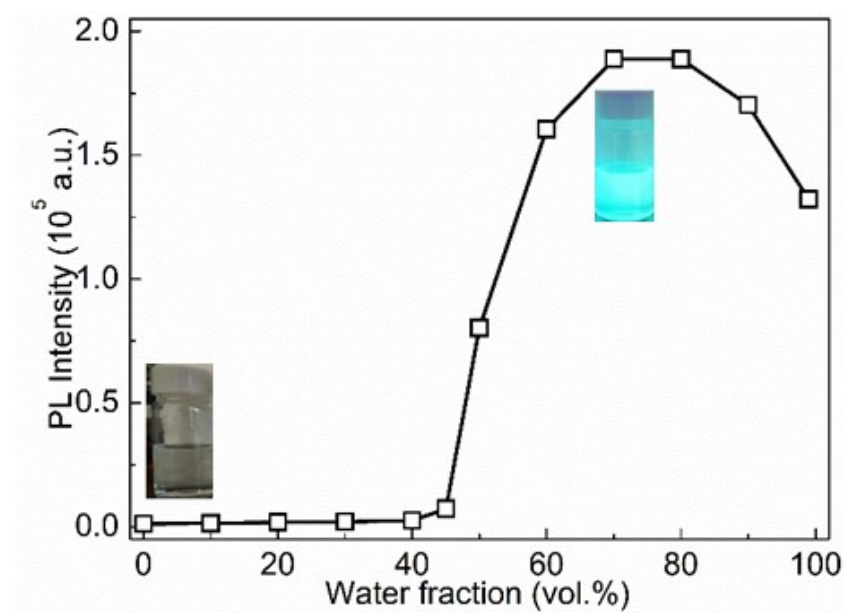

**Fig. S12.** PL intensity at maximum PL intensity as a function of water fraction for tpe-bpp at room temperature. Inset showed the photographs of tpe-bpp in DMF/water mixtures with different water fractions under 365 nm UV illumination.

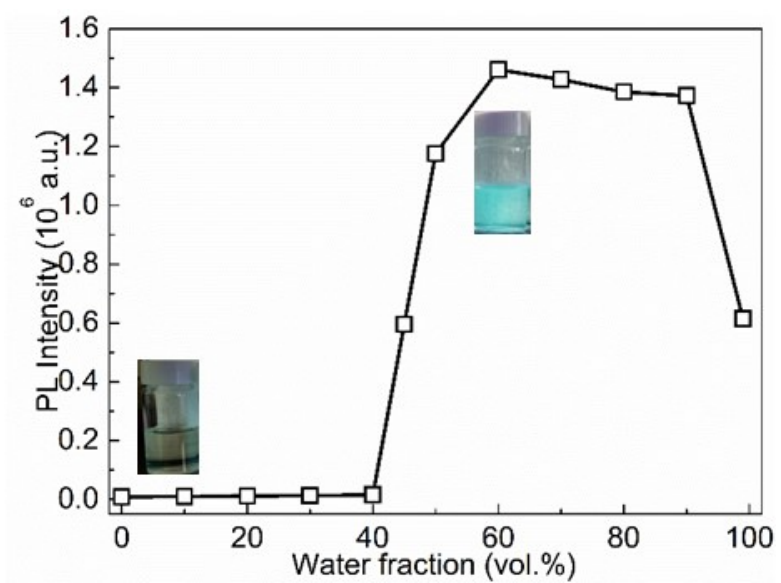

**Fig. S13.** PL intensity at maximum PL intensity as a function of water fraction for **1** at room temperature. Inset showed the photographs of **1** in DMF/water mixtures with different water fractions under 365 nm UV illumination.

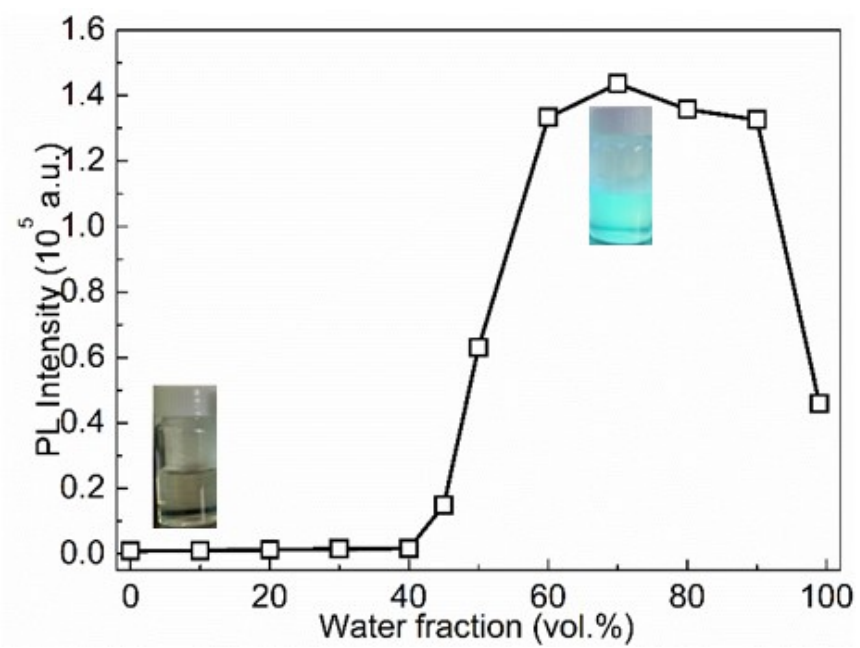

**Fig. S14.** PL intensity at maximum PL intensity as a function of water fraction for **3** at room temperature. Inset showed the photographs of **3** in DMF/water mixtures with different water fractions under 365 nm UV illumination.

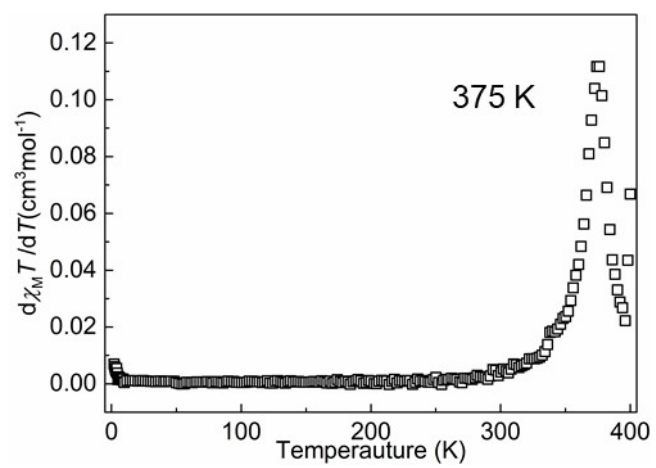

**Fig. S15.**  $d(\chi_M T)/dT$  versus  $T$  for complex **1**.

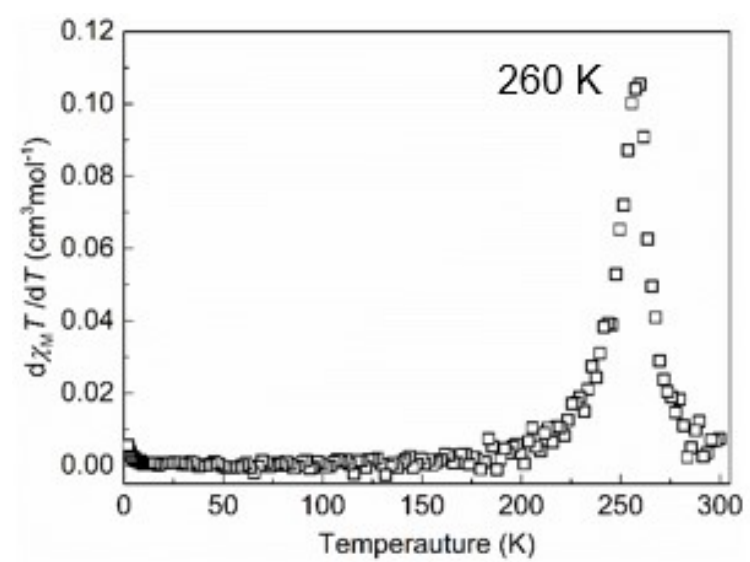

**Fig. S16.**  $d(\chi_M T)/dT$  versus  $T$  for complex 2.

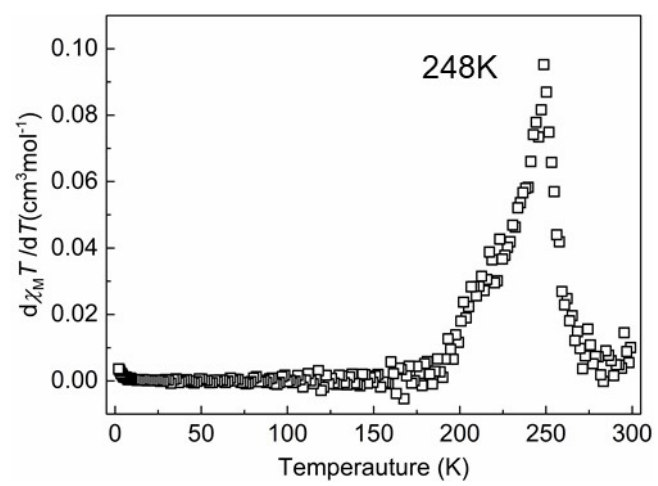

**Fig. S17.**  $d(\chi_M T)/dT$  versus  $T$  for complex **3**.



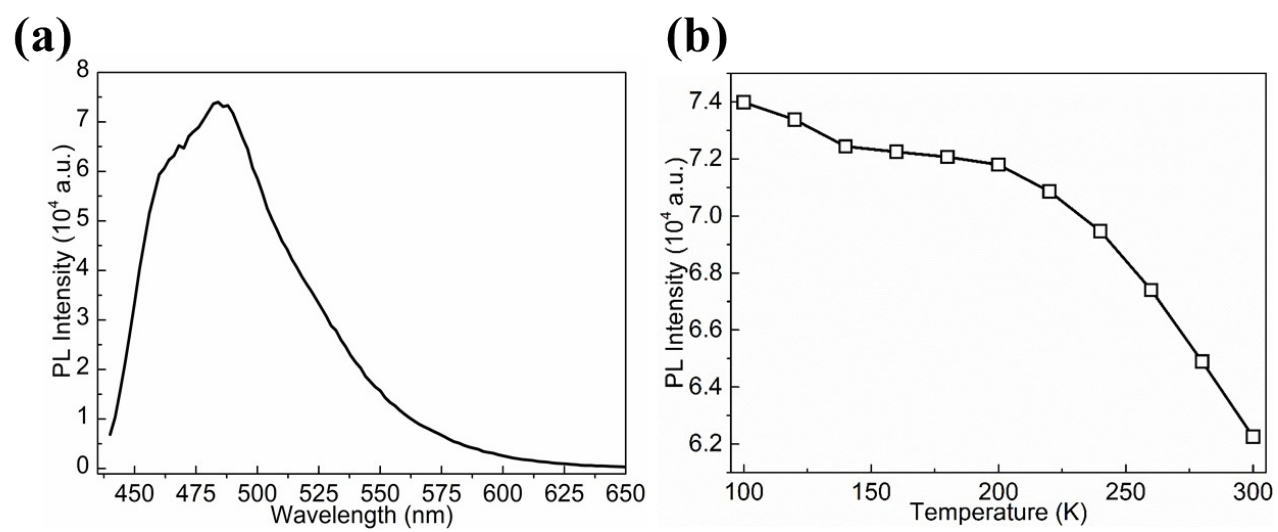

**Fig. S18** (a) Luminescence emission spectrum for the tpe-bpp ligand in the solid state at 100 K. (b) The PL intensity of maximum emission as a function of temperature for solid tpe-bpp.

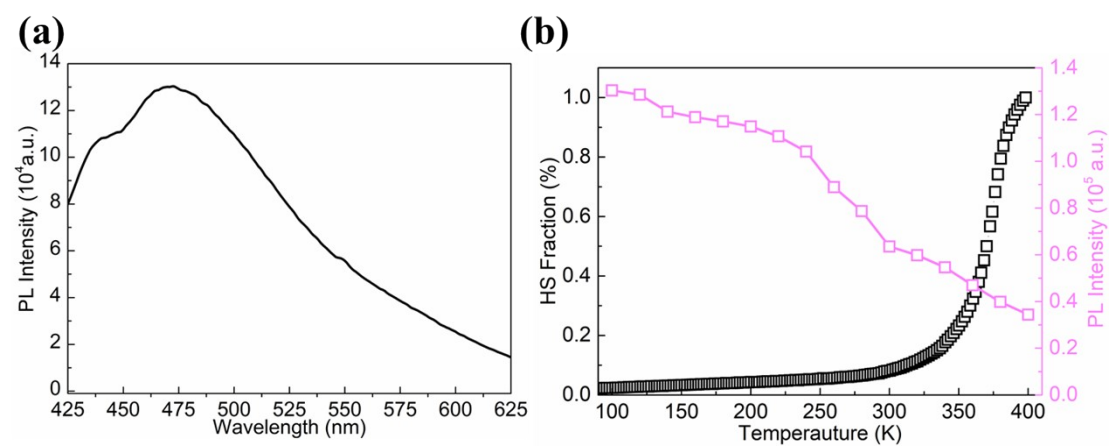

**Fig. S19** Luminescence emission spectrum for the complex **1** in solid state at 100 K. (b) Plots of the HS fraction of Fe<sup>II</sup> ion (□ black squares) and the PL intensity of maximum emission (□ pink squares) as a function of temperature for solid **1**.

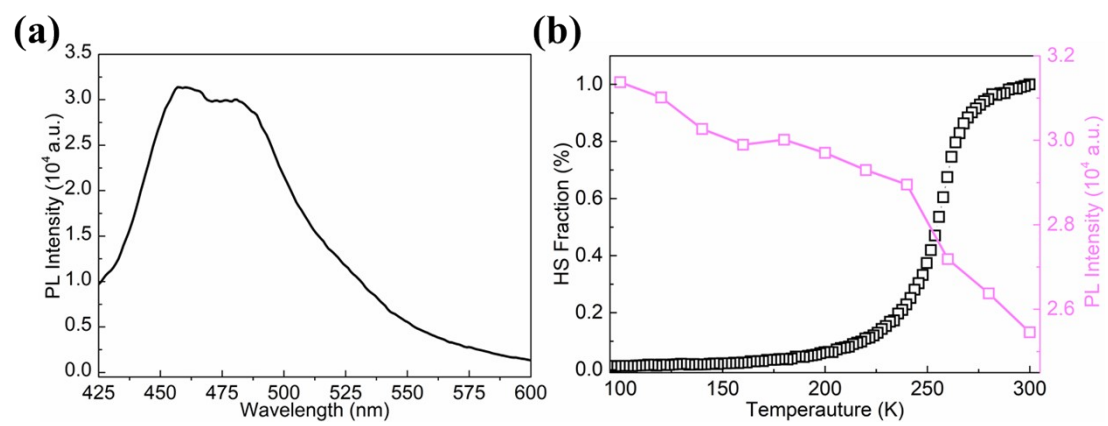

**Fig. S20** Luminescence emission spectrum for the complex **2** in solid state at 100 K. (b) Plots of the HS fraction of Fe<sup>II</sup> ion (□ black squares) and the PL intensity of maximum emission (□ pink squares) as a function of temperature for solid **2**.

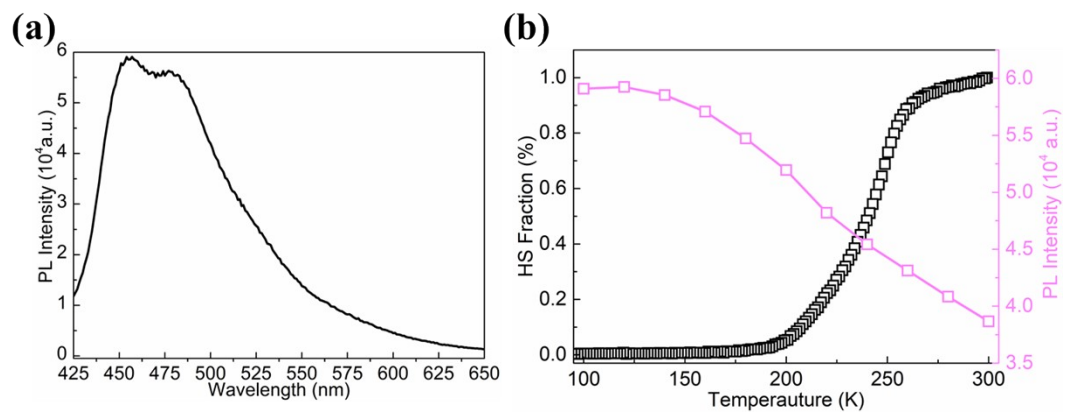

**Fig. S21** Luminescence emission spectrum for the complex **3** in solid state at 100 K. (b) Plots of the HS fraction of Fe<sup>II</sup> ion (□ black squares) and the PL intensity of maximum emission (□ pink squares) as a function of temperature for solid **3**.

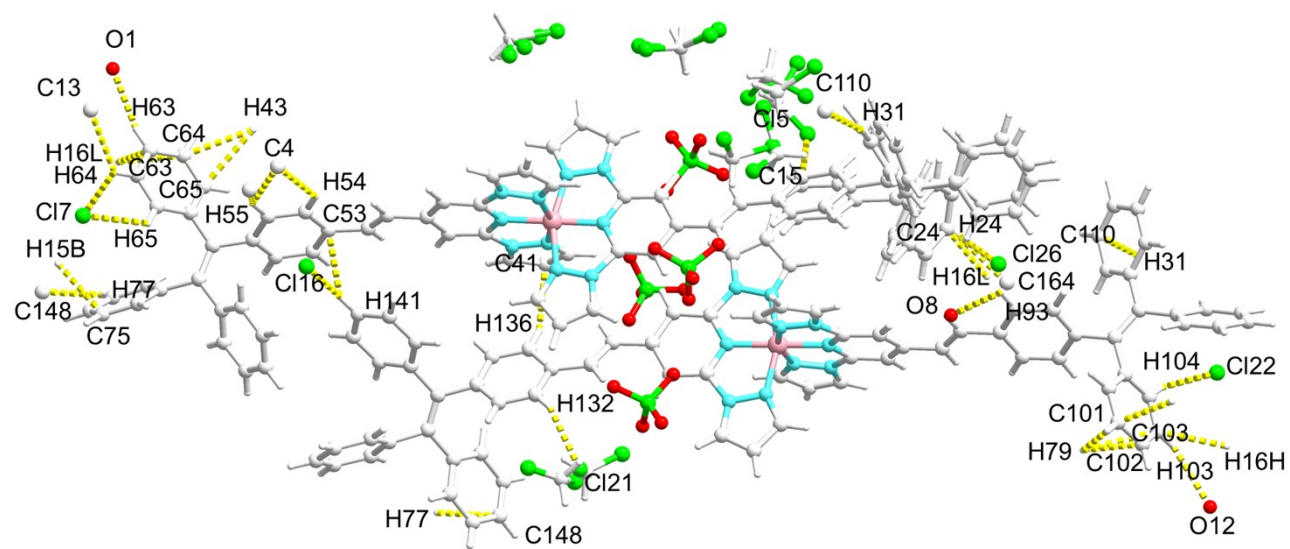

**Fig. S22** The intermolecular short contact interactions between tpe units and other groups for **1** at 120 K (yellow dashed lines).

Top

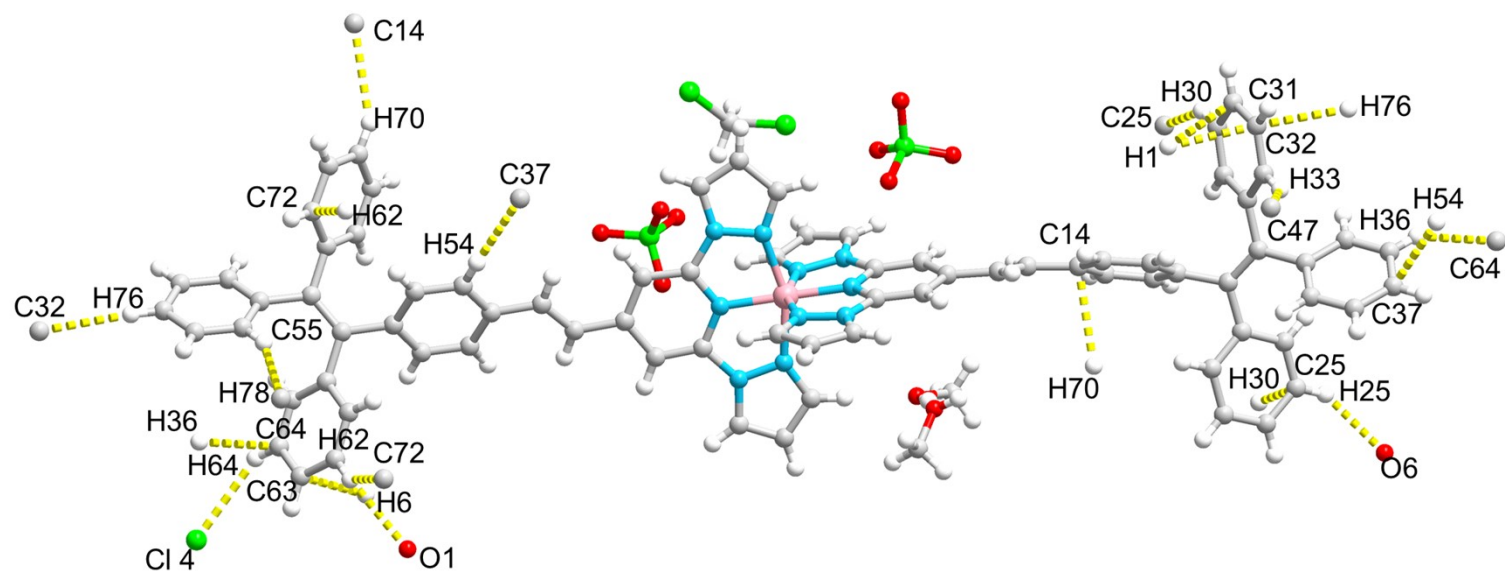

Bottom

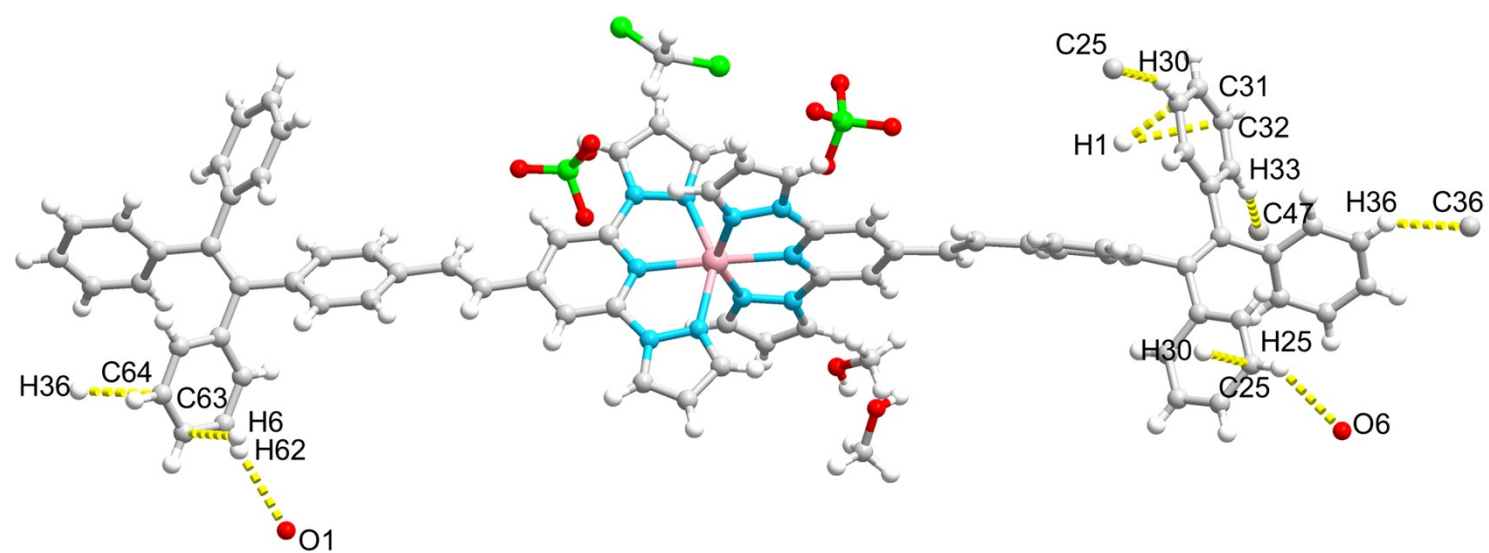

**Fig. S23** The intermolecular short contact interactions (yellow dashed lines) between tpe units and other groups for **2** at 120K (top) and 275 K (bottom).

Top

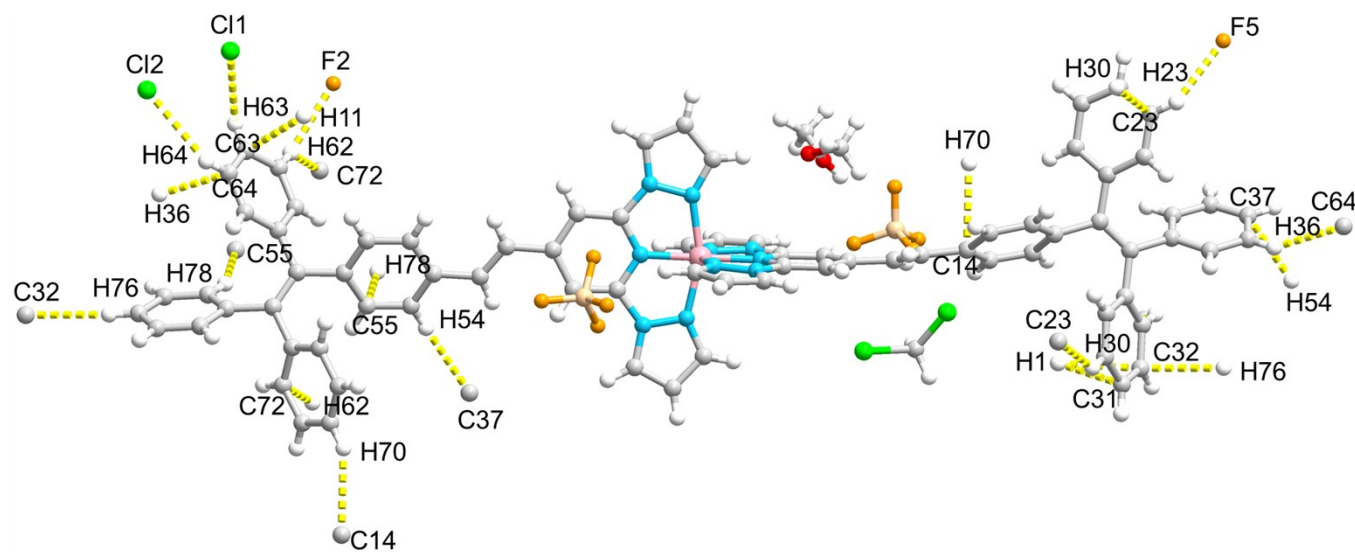

Bottom

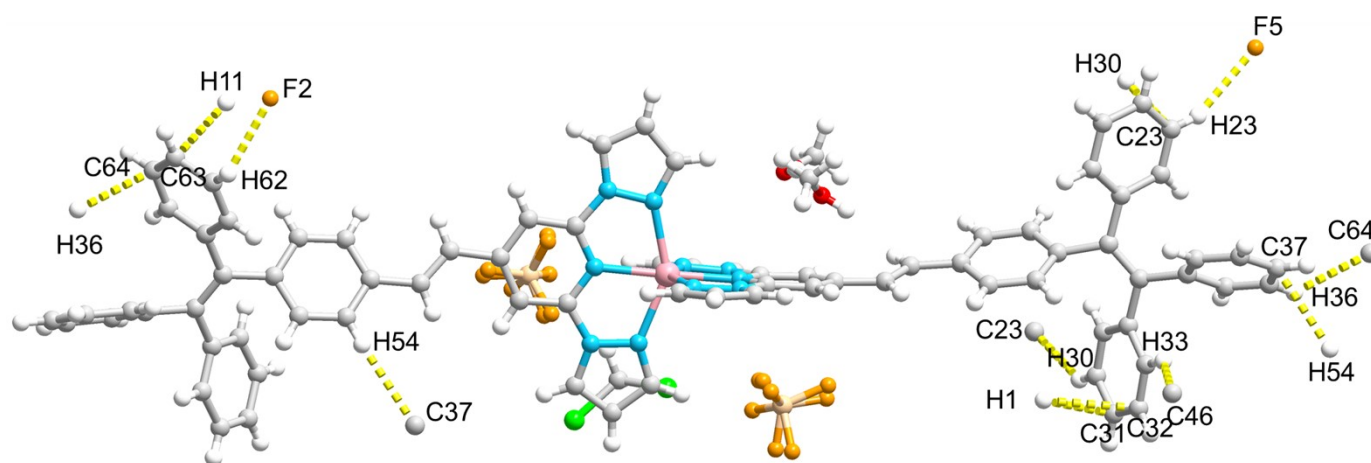

**Fig. S24** The intermolecular short contact interactions (yellow dashed lines) between tpe units and other groups for **3** at 120 (top) and 300 (bottom) K.

**Table S5.** Short contact interactions between phenyl and other groups for **1** at 120 K.

| <b>1</b>          |       |                   |       |
|-------------------|-------|-------------------|-------|
| C15 – H15···Cl 9  | 2.642 | C65 – H65···Cl 7  | 2.856 |
| C24 – H24···Cl 23 | 2.440 | C75···H15B – C158 | 2.583 |
| C24 – H24···C164  | 2.497 | C77 – H77···C148  | 2.880 |
| C24···H16L – C164 | 2.603 | C93 – H93···O8    | 2.625 |
| C25 – H25···Cl 23 | 2.904 | C101···H79 – C79  | 2.851 |

|                   |       |                     |       |
|-------------------|-------|---------------------|-------|
| C31 – H31···C110  | 2.676 | C101···H142– C142   | 2.828 |
| C53···H141 – C141 | 2.877 | C102···H79 – C79    | 2.731 |
| C54 – H54···C4    | 2.811 | C103···H79 – C79    | 2.855 |
| C55 – H55···C4    | 2.842 | C103 – H103···O12   | 2.699 |
| C55 – H55···C5    | 2.792 | C103···H16H – C161  | 2.718 |
| C55 – H55···C6    | 2.822 | C104 – H104···Cl 22 | 2.853 |
| C61···H49 – C43   | 2.838 | C110···H31 – C31    | 2.676 |
| C62···H49 – C43   | 2.869 | C132 – H132···Cl 21 | 2.611 |
| C62···H16L – C164 | 2.898 | C132···H16O – C163  | 2.817 |
| C63···H16L – C164 | 2.537 | C136 – H136···C41   | 2.814 |
| C63 – H63···O1    | 2.563 | C141 – H141···C53   | 2.877 |
| C64 – H64···C13   | 2.828 | C141 – H141···Cl 6  | 2.944 |
| C64 – H64···Cl 7  | 2.861 | C148···H77 – C77    | 2.880 |

---



**Table S6.** Short contact interactions between phenyl and other groups for **2** at 120 and 275 K.

| <b>2</b>        |       |                 |       |
|-----------------|-------|-----------------|-------|
| 120 K           |       | 275 K           |       |
| C14···H70 – C70 | 2.886 |                 |       |
| C25 – H25···O6  | 2.436 | C25 – H25···O6  | 2.653 |
| C25···H30 – C30 | 2.834 | C25···H30 – C30 | 2.861 |
| C30 – H30···C25 | 2.834 | C30 – H30···C25 | 2.861 |
| C31···H1 – C1   | 2.714 | C31···H1 – C1   | 2.755 |
| C32···H1 – C1   | 2.657 | C32···H1 – C1   | 2.813 |
| C32···H76 – C76 | 2.870 |                 |       |
| C33 – H33···C47 | 2.820 | C33 – H33···C47 | 2.879 |
| C36 – H36···C64 | 2.697 | C36 – H36···C64 | 2.805 |
| C37···H54 – C54 | 2.755 | C62 – H62···O1  | 2.691 |
| C54 – H54···C37 | 2.755 | C63···H6 – C6   | 2.806 |
| C55···H78 – C78 | 2.852 | C64···H36 – C36 | 2.805 |
| C62 – H62···C72 | 2.825 |                 |       |
| C62 – H62···O1  | 2.611 |                 |       |
| C63···H6 – C6   | 2.762 |                 |       |
| C64 – H64···C14 | 2.924 |                 |       |
| C64···H36 – C36 | 2.697 |                 |       |
| C70 – H70···C14 | 2.886 |                 |       |
| C72···H62 – C62 | 2.825 |                 |       |
| C76 – H76···C32 | 2.870 |                 |       |
| C78 – H78···C55 | 2.852 |                 |       |

**Table S7.** Short contact interactions between phenyl and other groups for **3** at 120 and 275 K.

| <b>3</b>         |       |                 |       |
|------------------|-------|-----------------|-------|
| 120 K            |       | 275 K           |       |
| C14···H70 – C70  | 2.847 |                 |       |
| C23···H30 – C30  | 2.850 | C23···H30 – C30 | 2.850 |
| C23 – H23···F5   | 2.450 | C23 – H23···F5  | 2.594 |
| C30 – H30···C23  | 2.850 | C30 – H30···C23 | 2.850 |
| C31···H1 – C1    | 2.715 | C31···H1 – C1   | 2.734 |
| C32···H1 – C1    | 2.662 | C32···H1 – C1   | 2.832 |
| C32···H76 – C76  | 2.867 |                 |       |
| C33 – H33···C46  | 2.826 | C33 – H33···C46 | 2.870 |
| C36 – H36···C64  | 2.665 | C36 – H36···C64 | 2.789 |
| C37···H54 – C54  | 2.731 | C37···H54 – C54 | 2.864 |
| C54 – H54···C37  | 2.731 | C54 – H54···C37 | 2.864 |
| C55···H78 – C78  | 2.822 |                 |       |
| C62 – H62···C72  | 2.815 | C62 – H62···F2  | 2.581 |
| C62 – H62···F2   | 2.583 | C63···H11 – C11 | 2.794 |
| C63···H11 – C11  | 2.730 |                 |       |
| C63 – H63···Cl 1 | 2.936 |                 |       |
| C64 – H64···Cl 2 | 2.936 | C64···H36 – C36 | 2.788 |
| C64···H36 – C36  | 2.665 |                 |       |
| C70 – H70···C14  | 2.847 |                 |       |
| C72···H62 – C62  | 2.815 |                 |       |
| C76 – H76···C32  | 2.867 |                 |       |
| C78 – H78···C55  | 2.822 |                 |       |

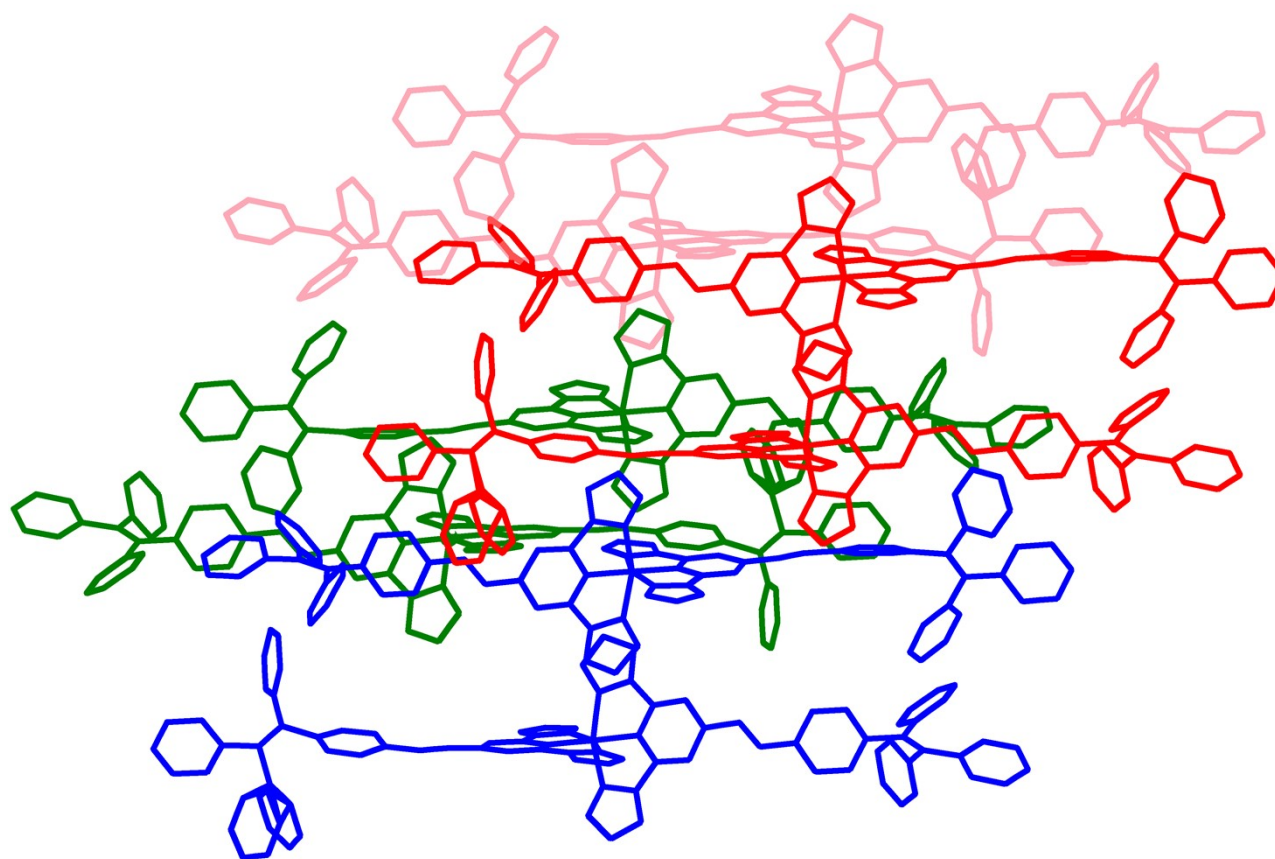

**Fig.** S25 Crystal packing diagram of complex **1**.

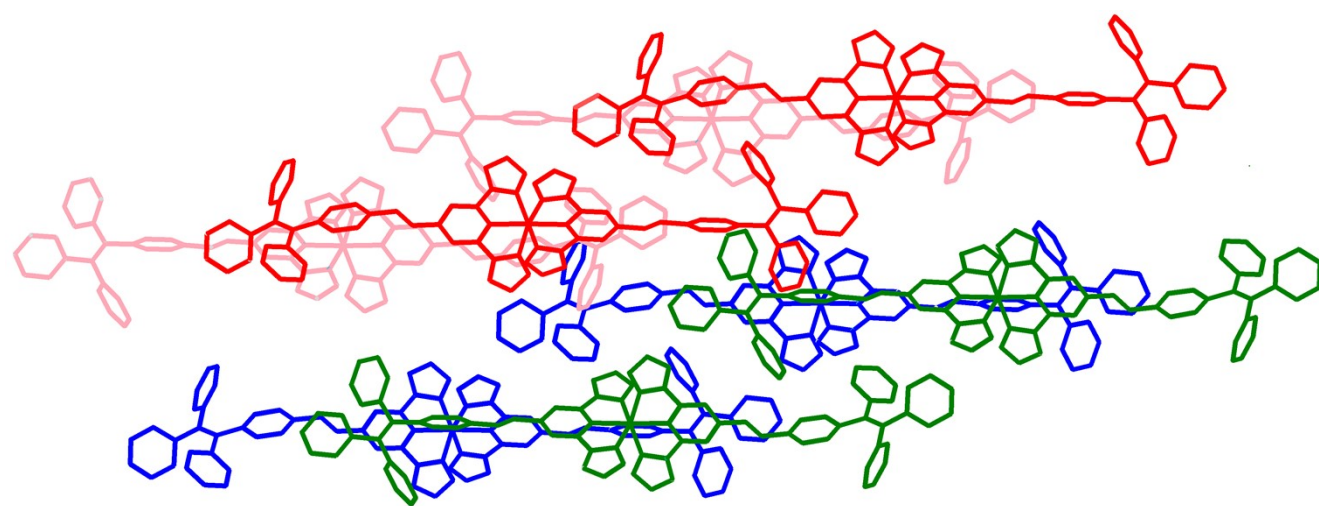

**Fig.** S26 Crystal packing diagram of complex 2.

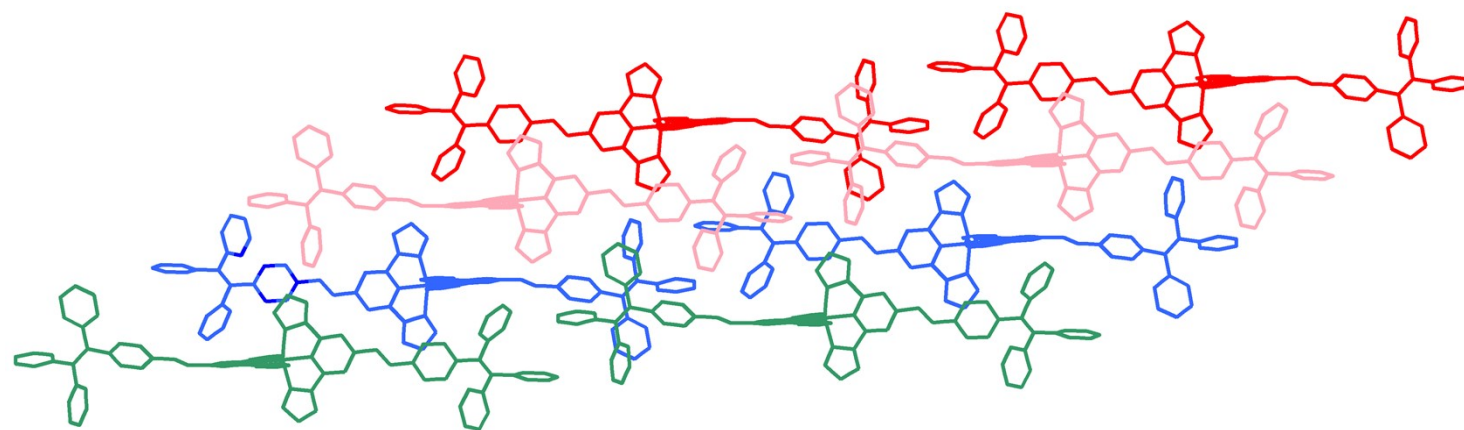

**Fig. S27.** Crystal packing diagram of complex 3.
